# Supplementary material for: Methylaluminium 8-quinolinolates: synthesis, characterization and use in ring-opening polymerization (ROP) of ε-caprolactone
Source: Royal Society of Chemistry journal article supplement (doi:10.1039/c0dt01207f), 2011-01-01
Supplement: c0dt01207f.pdf [file c0dt01207f.pdf]

## Supporting Information

for

### Synthesis and characterization of Methylaluminium containing 8-Quinolinolatos and their Ring-opening polymerization of $\epsilon$ -Caprolactone

Wen-Hua Sun\*<sup>a</sup>, Miao Shen,<sup>a</sup> Wenjuan Zhang,<sup>a</sup> Wei Huang,<sup>a</sup> Shaofeng Liu<sup>a</sup> and Carl Redshaw\*<sup>b</sup>

<sup>a</sup> Key Laboratory of Engineering Plastics and Beijing National Laboratory for Molecular Sciences, Institute of Chemistry, Chinese Academy of Sciences, Beijing 100190, China.

<sup>b</sup> School of Chemistry, University of East Anglia, Norwich, NR4 7TJ, UK

Single crystals of **12** suitable for X-ray structural analysis were obtained from chilled toluene/*n*-heptane or dichloromethane/*n*-heptane solutions. With graphite-mnchromated Mo K $\alpha$  radiation ( $\lambda = 0.71073 \text{ \AA}$ ), cell parameters were obtained by global refinement of the positions of all collected reflections. Intensities were corrected for Lorentz and polarization effects and empirical absorption. The structure was solved by direct methods and refined by full-matrix least squares on  $F^2$ . All hydrogen atoms were placed in calculated positions. Structure solution and refinement were performed by using the SHELXL-97 package.<sup>1</sup> Details of the X-ray structure determination and refinement are provided in Table S1 and its molecular structure is shown in Fig. S1. Due to relative poor quality of the single crystal, the R value is high. CCDC No.783405 for crystallographic data of complex **12**. See <http://www.ccdc.cam.ac.uk/deposit>.

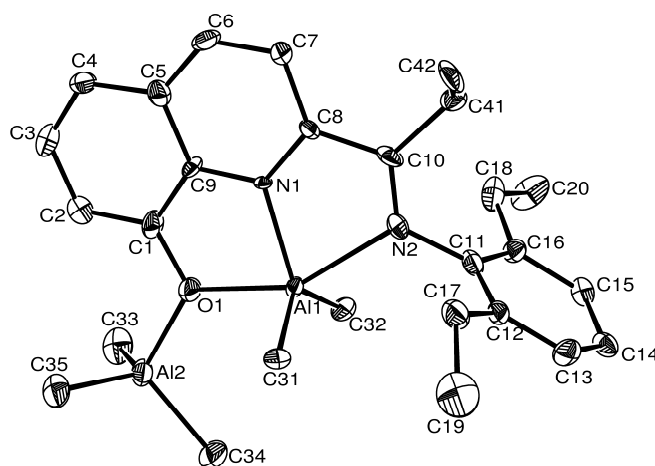

**Figure S1.** ORTEP drawing of **12** with thermal ellipsoids drawn at the 30% probability level.

Hydrogen atoms are omitted for clarity.

Table S1. Crystal Data and Refinement Details for **12**

|                                                       |                                                                  |
|-------------------------------------------------------|------------------------------------------------------------------|
| Empirical formula                                     | C <sub>27</sub> H <sub>38</sub> N <sub>2</sub> Al <sub>2</sub> O |
| Formula weight                                        | 460.55                                                           |
| Crystal color                                         | Yellow                                                           |
| Temperature (K)                                       | 173(2)                                                           |
| Wavelength (Å)                                        | 0.71073                                                          |
| Crystal system                                        | Monoclinic                                                       |
| space group                                           | C2/c                                                             |
| <i>a</i> (Å)                                          | 29.760(16)                                                       |
| <i>b</i> (Å)                                          | 12.705(7)                                                        |
| <i>c</i> (Å)                                          | 16.265(9)                                                        |
| $\alpha$ (°)                                          | 90.0                                                             |
| $\beta$ (°)                                           | 104.669(7)                                                       |
| $\gamma$ (°)                                          | 90.0                                                             |
| Volume (Å <sup>3</sup> )                              | 5949(6)                                                          |
| <i>Z</i>                                              | 8                                                                |
| <i>D</i> <sub>calc</sub> (Mg m <sup>-3</sup> )        | 1.028                                                            |
| $\mu$ (mm <sup>-1</sup> )                             | 0.116                                                            |
| F(000)                                                | 1984                                                             |
| Crystal size (mm)                                     | 0.19×0.10×0.09                                                   |
| $\theta$ range (°)                                    | 2.59 – 25.00                                                     |
|                                                       | – 35 ≤ <i>h</i> ≤ 33                                             |
| Limiting indices                                      | – 15 ≤ <i>k</i> ≤ 15                                             |
|                                                       | – 15 ≤ <i>l</i> ≤ 19                                             |
| No. of rflns collected                                | 19739                                                            |
| No. of unique rflns                                   | 5236                                                             |
| R <sub>int</sub>                                      | 0.1695                                                           |
| Completeness to $\theta$ (%)                          | 99.8 ( $\theta = 25.00$ )                                        |
| Goodness-of-fit on F <sup>2</sup>                     | 1.383                                                            |
| Final R indices [ <i>I</i> > 2 $\sigma$ ( <i>I</i> )] | R1 = 0.2014<br>wR2 = 0.4507                                      |
| R indices (all data)                                  | R1 = 0.2734<br>wR2 = 0.4917                                      |
| Largest diff peak, hole (e Å <sup>-3</sup> )          | 0.593, – 0.673                                                   |

Reference: G. M. Sheldrick, *SHELXL-97, Program for the Refinement of Crystal Structure*, University of Göttingen, Göttingen, Germany, 1997
